# Supplementary material for: Protective Behaviors Associated With Gender During the 2018-2020 Ebola Outbreak in Eastern Democratic Republic of the Congo
Source: PubMed Central journal article supplement (PMC8851299; doi:10.1001/jamanetworkopen.2021.47462), 2022-02-16
Supplement: jamanetwopen-e2147462-s001.pdf [file jamanetwopen-e2147462-s001.pdf]

## Supplemental Online Content

Pham PN, Sharma M, Bindu KK, et al. Protective behaviors associated with gender during the 2018-2020 Ebola outbreak in Eastern Democratic Republic of the Congo. *JAMA Netw Open*. 2022;5(2):e2147462. doi:10.1001/jamanetworkopen.2021.47462

**eFigure.** Conceptual Model

**eTable.** Additional Model Fit Statistics

This supplemental material has been provided by the authors to give readers additional information about their work.

**eFigure. Conceptual Model**

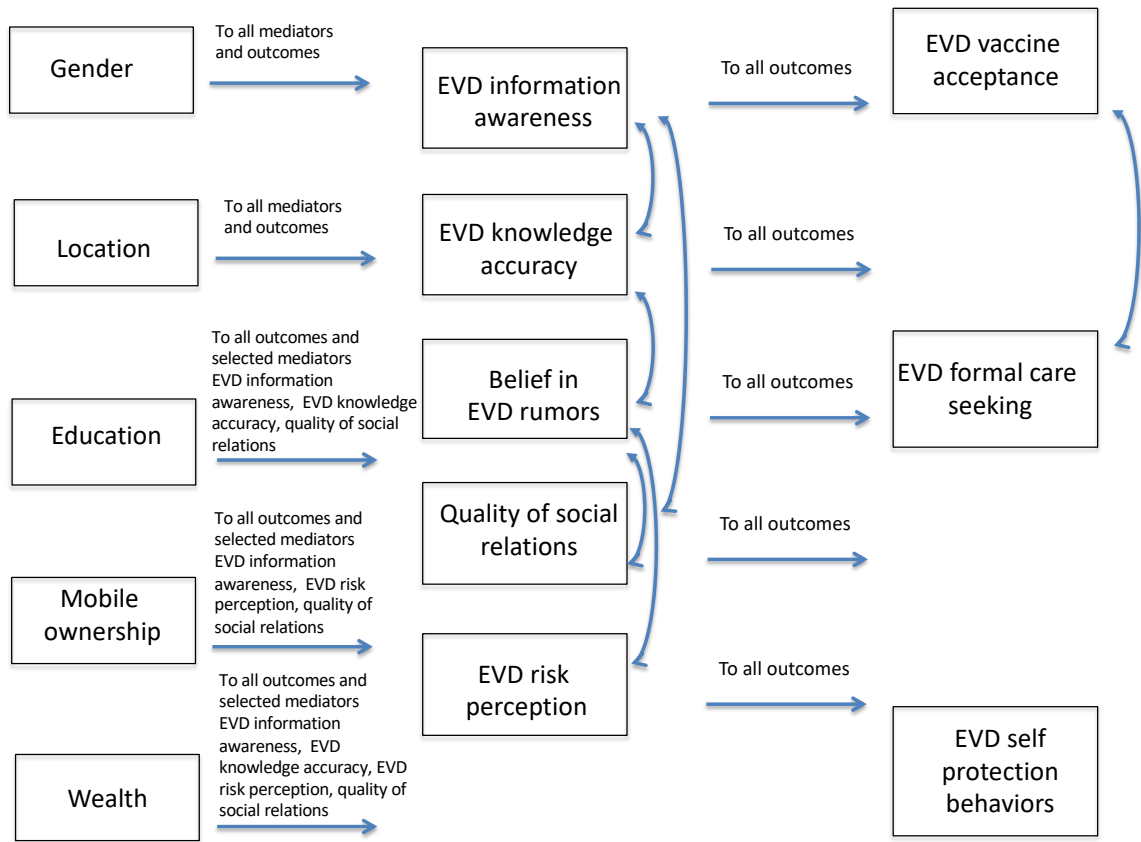

Abbreviation: EVD, Ebola Virus Disease

**eTable:** Additional Model fit statistics

|              | <b>High EVD Risk (N=1395)</b> |
|--------------|-------------------------------|
| <b>RMSEA</b> | 0.08                          |
| <b>CFI</b>   | 0.92                          |
| <b>TLI</b>   | 0.75                          |
| <b>CD</b>    | 0.26                          |
| <b>AIC</b>   | 49635.94                      |
| <b>BIC</b>   | 49929.41                      |

Abbreviations: RMSEA, Root mean square error of approximation; CFI, Comparative fit index;

TLI, Tucker lewis index; CD, coefficient of determination; AIC, Akaike information criteria;

BIC, Bayesian information criteria
